# Supplementary material for: The Transcription Factor Nrf2 Mediates the Effects of Antrodia camphorata Extract on Neuropathological Changes in a Mouse Model of Parkinson’s Disease
Source: MDPI journal article supplement (doi:10.3390/ijms24119250), 2023-05-25
Supplement: s1 [file s1]

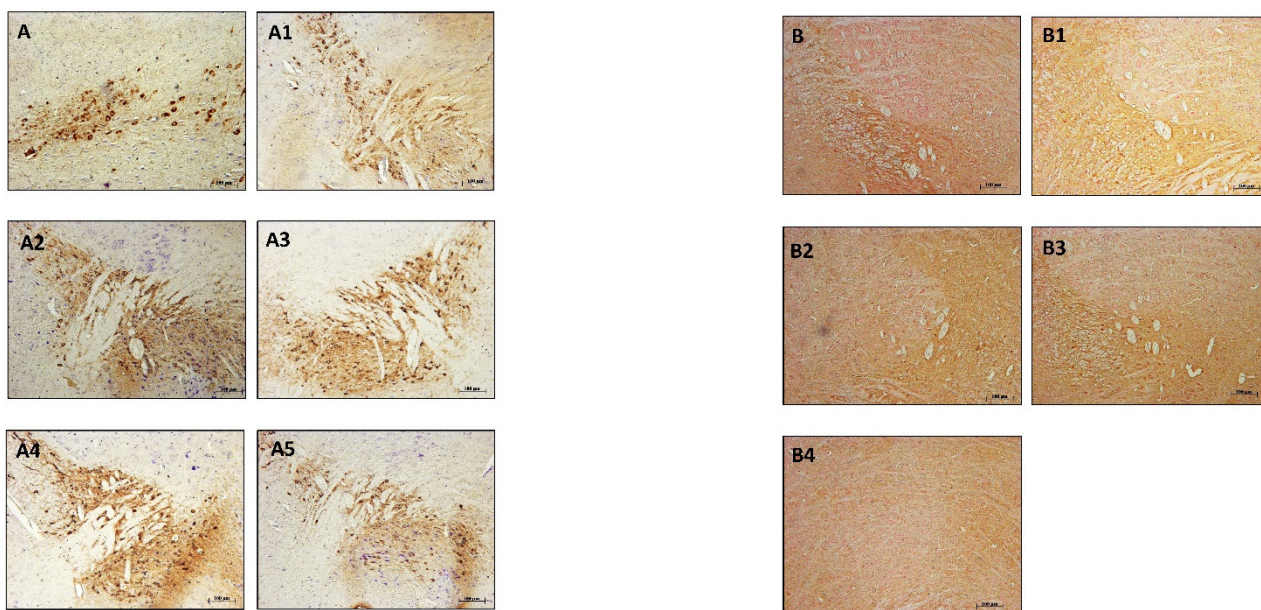

**Supplementary Figure S1.** Effect of AC treatment on TH (A-A5) and  $\alpha$ -synuclein (B-B4) expression in substantia nigra. Images were shown by using an objective lens at 10  $\times$  (100  $\mu$ m) of the bar scale. Sham group (A-B). Sham treated with AC 100 mg/kg (A1). MPTP group (A2- B1). AC treatments at the doses of 10, 30 and 100 mg/kg (A3–A5 and B2-B4).

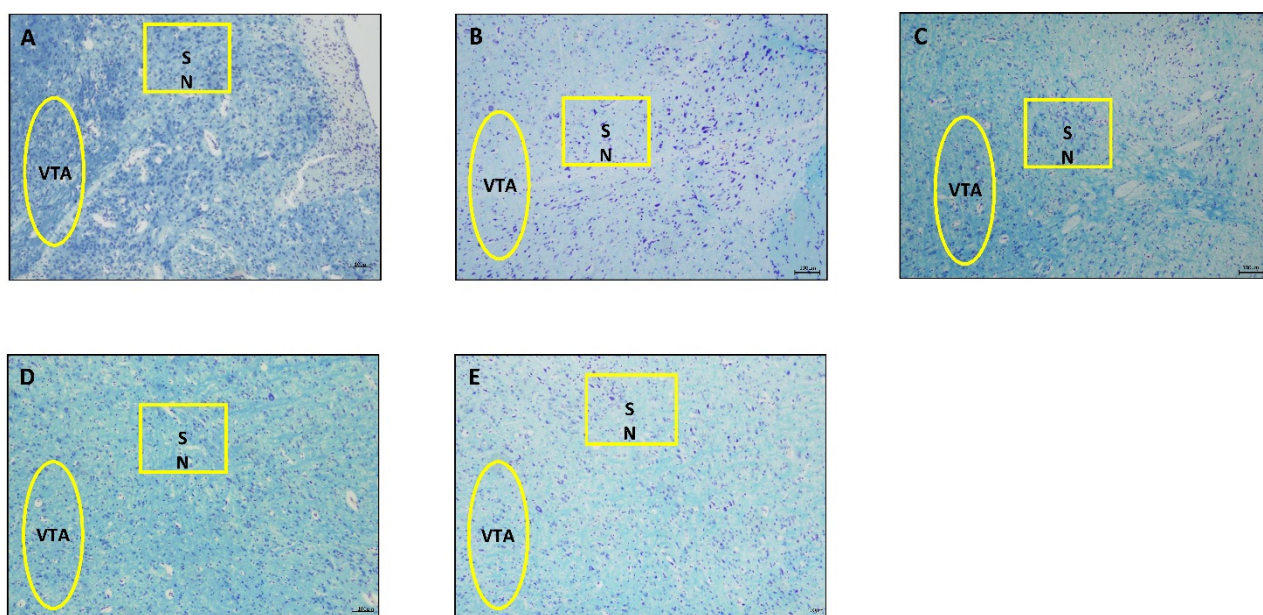

**Supplementary Figure S2.** Effect of AC on the myelination process in substantia nigra and VTA. Images were shown by using an objective lens at 10  $\times$  (100  $\mu$ m) of the bar scale. Sham group (A) and MPTP group (B). AC treatment at the doses of 10, 30 and 100 mg/kg (C-D-E).
